# Supplementary material for: Two-reactor, continuous culture fermentation for fuel ethanol production from lignocellulosic acid hydrolysate using Zymomonas mobilis and Scheffersomyces stipitis
Source: Royal Society of Chemistry journal article supplement (doi:10.1039/c4ra02377c), 2014-01-01
Supplement: c4ra02377c1.pdf [file c4ra02377c1.pdf]

### Supplementary I

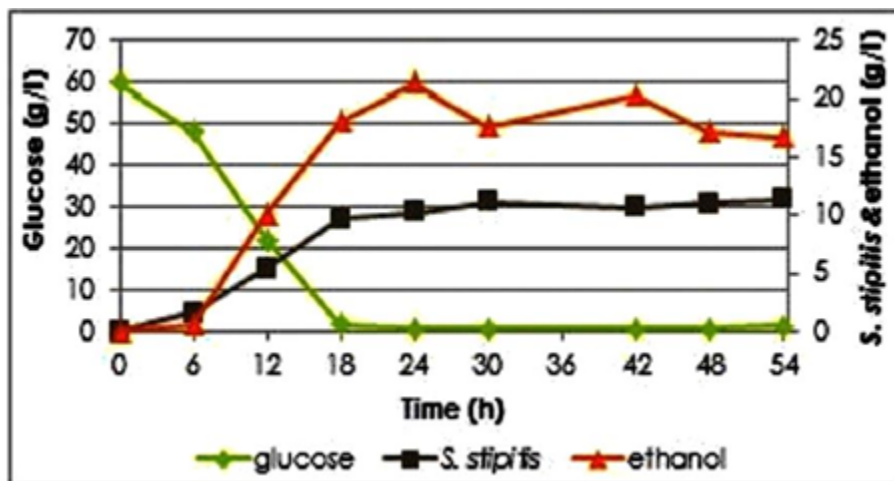

**Figure S1:** Control of *S. stipitis* with glucose only (60 g/L glucose)

**Table S1:** different kinetic parameters obtained with Control of *S. stipitis* with glucose only (60 g/L glucose)

| Microorganism                             | <i>S. stipitis</i> |
|-------------------------------------------|--------------------|
| Type of sugars                            | glucose            |
| Initial total reducing sugar $S_0$ (g/l)  | 60.00              |
| Maximum ethanol concentration (g/l)       | 21.42              |
| Maximum cell concentration (g/l)          | 10.22              |
| Maximum time (h)                          | 24.00              |
| Sugar consumption (%)                     | 98.72              |
| Ethanol yield coefficient $Y_{P/S}$ (g/g) | 0.36               |
| Cell biomass yield $Y_{x/S}$ (g/g)        | 0.17               |
| Ethanol productivity $r_p$ (g/l/h)        | 0.89               |
